# Supplementary material for: Evaluation of the Binding Kinetics of RHEB with mTORC1 by In-Cell and In Vitro Assays
Source: MDPI journal article supplement (doi:10.3390/ijms22168766), 2021-08-16
Supplement: s1 [file s1]

Supplementary materials for

# Evaluation of the Binding Kinetics of RHEB with mTORC1 by In-cell and In vitro Assays

Raef Shams<sup>1,2</sup>, Yoshihiro Ito<sup>1,3</sup> and Hideyuki Miyatake<sup>2,3,\*</sup>

<sup>1</sup> Emergent Bioengineering Materials Research Team, RIKEN Center for Emergent Matter Science, RIKEN, Wako, Saitama 351-0198, Japan; [raef.shams@riken.jp](mailto:raef.shams@riken.jp) (R.S.); [y-ito@riken.jp](mailto:y-ito@riken.jp) (Y.I.)

<sup>2</sup> Department of Life Science, Graduate School of Science and Engineering, Saitama University, Saitama city, Saitama 338-8570, Japan; [miyatake@riken.jp](mailto:miyatake@riken.jp) (H.M.)

<sup>3</sup> Nano Medical Engineering Laboratory, RIKEN Cluster for Pioneering Research, RIKEN, Wako, Saitama 351-0198, Japan

\* Correspondence: [miyatake@riken.jp](mailto:miyatake@riken.jp); Tel.: + 81-48-467-4979

## Content:

### 1- Supplementary notes:

- 1.1. Human mTOR gene sequence (7647 bp)
- 1.2. Human RHEB gene sequence (507 bp)

### 2- Supplementary figures:

- 2.1. Figure S1. On-lysosome activation of mTORC1 by RHEB.
- 2.2. Figure S2. Construction and purification of overexpressed mTOR.
- 2.3. Figure S3. Construction and purification of overexpressed RHEB.
- 2.4. Figure S4. The established AlphaLISA method for RHEB–mTOR interaction.
- 2.5. Figure S5. The constructed plasmids for NanoBiT assay.
- 2.6. Figure S6. Construction and purification of overexpressed  $\Delta$ N-FAT-M.
- 2.7. Figure S7. Construction and purification of overexpressed  $\Delta$ N.
- 2.8. Figure S8. Construction and purification of overexpressed  $\Delta$ ATP.
- 2.9. Figure S9. Schematic illustration showing BLItz measurement steps.

**Note 1. Human mTOR gene sequence (7647 bp)**

(<http://www.kazusa.or.jp/kop/vd/FHC01207/>)

(<https://www.uniprot.org/uniprot/P42345>)

**Red highlights indicate gene sequences of the selected fragments of RHEB binding site**

```
1  ATGCTTGGAACCGGACCTGCCGCCGCCACCACCGCTGCCACCACATCTAGCAATGTGAGC
61  GTCCTGCAGCAGTTTGCCAGTGGCCTAAAGAGCCGGAATGAGGAAACCAGGGCCAAAGCC
121  GCCAAGGAGCTCCAGCACTATGTCCACCATGGAACCTCCGAGAGATGAGTCAAGAGGAGTCT N-heat
                                         S 60
181  ACTCGCTTCTATGACCAACTGAACCATCACATTTTTGAATTGGTTTCCAGCTCAGATGCC
    T R F Y D Q L N H H I F E L V S S S S D A 80
241  AATGAGAGGAAAGGTGGCATCTTGCCATAGCTAGCCTCATAGGAGTGGAAGGTGGGAAT
    N E R K G G I L A I A S L I G V E G G N 100
301  GCCACCGAATTGGCAGATTTGCCAACTCTTCGGAACCTCCTCCCCTCCAATGACCCA
    A T R I G R F A N Y L R N L L P S N D P 120
361  GTTGTTCATGGAATGGCATCCAGGCCATTGGCCGTCTTGCCATGGCAGGGGACACTTTT
    V V M E M A S K A I G R L A M A G D T F 140
421  ACCGCTGAGTACGTGGAATTTGAGGTGAAGCGAGCCCTGGAATGGCTGGGTGCTGACCGC
    T A E Y V E F E V K R A L E W L G A D R 160
481  AATGAGGGCCGGAGACATGCA GCTGTCTTGGTTCTCCGTGAGCTGGCCATCAGCGTCCCT
    N E G R R H A 180
541  ACCTTCTTCTTCCAGCAAGTGCAACCCTTCTTTGACAACATTTTTGTGGCCGTGTGGGAC
601  CCCAAACAGGCCATCCGTGAGGGAGCTGTAGCCGCCCTTCTGTGCCTGTCTGATTCTCACA
661  ACCCAGCGTGAGCCGAAGGAGATGCAGAAGCCTCAGTGGTACAGGCACACATTTGAAGAA
721  GCAGAGAAGGGATTTGATGAGACCTTGGCCAAAGAGAAGGGCATGAATCGGGATGATCGG
781  ATCCATGGAGCCTTGTGTGATCCTTAACGAGCTGGTCCGAATCAGCAGCATGGAGGGAGAG
841  CGTCTGAGAGAAGAAAATGGAAGAAAATCACACAGCAGCAGCTGGTACACGACAAGTACTGC
901  AAAGATCTCATGGGCTTCGGAACAAAACCTCGTCACATTACCCCTTCACCAGTTTCCAG
961  GCTGTACAGCCCCAGCAGTCAAATGCCTTGGTGGGGCTGCTGGGGTACAGCTCTACCAA
1021  GGCTCATGGGATTTGGGACCTCCCCAGTCCAGCTAAGTCCACCTGGTGGAGAGCCGG
1081  TGTTGCAGAGACTTGATGGAGGAGAAAATTTGATCAGGTGTGCCAGTGGGTGCTGAAATGC
1141  AGGAATAGCAAGAACTCGCTGATCCAAATGACAATCCTTAATTTGTTGCCCTGCTGGCT
1201  GCATTCGACCTTCTGCCTTCACAGATAACCCAGTATCTCCAAGATACCATGAACCATGTC
1261  CTAAGCTGTGTCAAGAAGGAGAAGGAACGTACAGCGGCCTTCCAAGCCCTGGGGCTACTT
1321  TCTGTGGCTGTGAGGTCTGAGTTTAAGGTCTATTTGCCTCGCGTGCTGGACATCATCCGA
1381  GCGGCCCTGCCCCCAAAGGACTTCGCCCATAAGAGGCAGAAGGCAATGCAGGTGGACGCC
1441  ACAGTCTTCACTTGATCAGCATGCTGGCTCGAGCAATGGGGCCAGGCATCCAGCAGGAT
1501  ATCAAGGAGCTGCTGGAGCCATGCTGGCAGTGGGACTAAGCCCTGCCCTCACTGCAGTG
1561  CTCTACGACCTGAGCCGTCAGATTCCACAGCTAAAGAAGGACATTCAGATGGGCTACTG
1621  AAAATGCTGTCCCTTGTCTTATGCACAAACCCCTTCGCCACCCAGGCATGCCCAAGGGC
1681  CTGGCCCATCAGCTGGCCTCTCCTGGCCTCACGACCTCCCTGAGGCCAGCGATGTGGGC
1741  AGCATCACTCTTGCCCTCCGAACGCTTGGCAGCTTTGAATTTGAAGGCCACTCTCTGACC
1801  CAATTTGTTTCGCCACTGTGCGGATCATTTCTTGAACAGTGAGCACAAGGAGATCCGCATG
1861  GAGGCTGCCCCGACCTGCTCCCGCCTGCTCACACCCCTCCATCCACCTCATCAGTGGCCAT
1921  GCTCATGTGGTTAGCCAGACCGCAGTGCAAGTGGTGGCAGATGTGCTTAGCAAACCTGCTC
1981  GTAGTTGGGATAACAGATCCTGACCCTGACATTCGCTACTGTGTCTTGGCGTCCCTGGAC
2041  GAGCGCTTTGATGCACACCTGGCCAGGCGGAGAACTTGCAAGCCCTGTTTGTGGCTCTG
2101  AATGACCAGGTGTTTGAGATCCGGGAGCTGGCCATCTGCACTGTGGGCCGACTCAGTAGC
2161  ATGAACCTGCCTTTGTATGCCTTTCTTGCAGCAAGATGCTCATCCAGATTTTGACAGAG
2221  TTGGAGCACAGTGGGATTGGAAGAAATCAAAGAGCAGAGTGCCCGCATGCTGGGGCACCTG
2281  GTCTCCAATGCCCCCGACTCATCCGCCCTACATGGAGCCTATTCTGAAGGCATTAATT
2341  TTGAAAATGAAAAGATCCAGACCCCTGATCCAAACCCAGGTGTGATCAATAATGTCTGGCA
2401  ACAATAGGAGAAATTGGCACAGGTTAGTGGCCTGGAAATGAGGAAATGGGTGATGAACCTT
2461  TTTATTATCATCATGGACATGCTCCAGGATTCCTCTTTGTTGGCCAAAAGGCAGGTGGCT
2521  CTGTGGACCTGGGACAGTTGGTGGCCAGCACTGGCTATGTAGTAGAGCTCTACAGGAAG
2581  TACCCTACTTTGCTTGAGGTGCTACTGAATTTTCTGAAGACTGAGCAGAACCAGGGTACA
2641  CGCAGAGAGGCCATCCGTGTGTTAGGGCTTTTAGGGGCTTTGGATCCTTACAAGCACAAA
2701  GTGAACATTGGCATGATAGACCAGTCCCGGGATGCCTCTGCTGTGAGCCTGTCAGAATCC
```

|      |                                                                 |        |
|------|-----------------------------------------------------------------|--------|
| 2761 | AAGTCAAGTCAGGATTCTCTGACTATAGCACTAGTGAAATGCTGGTCAACATGGGAAAC     |        |
| 2821 | TTGCCTCTGGATGAGTTCTACCCAGCTGTGTCCATGGTGGCCCTGATGCGGATCTCCGA     |        |
| 2881 | GACCAGTCACTCTCTCAT                                              | M-heat |
|      | CATCACACCATGGTTGTCCAGGCCATCACCTTCATCTTCAAG                      |        |
|      | H H T M V V Q A I T F I F K                                     | 980    |
| 2941 | TCCCTGGGACTCAAATGTGTGCAGTTCTTGCCCCAGGTCATGCCACGTTCTTAAATGTC     |        |
|      | S L G L K C V Q F L P Q V M P T F L N V                         | 1000   |
| 3001 | ATTTCGAGTCTGTGATGGGGCCATCCGGAATTTTTGTTCCAGCAGCTGGGAATGTTGGTG    |        |
|      | I R V C D G A I R E F L F Q Q L G M L V                         | 1020   |
| 3061 | TCCTTTGTGAAGAGCCACATCAGACCTTATATGGATGAAATAGTCACCCCTCATGAGAGAA   |        |
|      | S F M                                                           | 1040   |
| 3121 | TTCTGGGTCATGAACACCTCAATTGAGAGCAGCATATTCTTCTCATTTGAGCAAATTGTG    |        |
| 3181 | GTAGCTCTTGGGGGTGAATTTAAGCTCTACCTGCCCCAGCTGATCCACACATGCTGCGT     |        |
| 3241 | GTCTTCATGCATGACAACAGCCCAGGCCGATTGTCTCTATCAAGTTACTGGCTGCAATC     |        |
| 3301 | CAGCTGTTTGGCGCCAACCTGGATGACTACCTGCATTTACTGCTGCCTCCTATTGTTAAG    |        |
| 3361 | TTGTTTGATGCCCCCTGAAGCTCCACTGCCATCTCGAAAGGCAGCGCTAGAGACTGTGGAC   |        |
| 3421 | CGCCTGACGGGATCCCTGGATTTCTGACTGACTATGCTCCCGGATCATTCACCTATTGTT    |        |
| 3481 | CGAACACTGGACCAGAGCCCAGAACTGCGCTCCACAGCCATGGACACGCTGTCTTCACTT    |        |
| 3541 | GTTTTTCAGCTGGGGAAGAAGTACCAAATTTTTCATTCCAATGGTGAATAAAGTTCTGGTG   |        |
| 3601 | CGACACCGAATCAATCATCAGCGCTATGATGTGCTCATCTGCAGAAATTGTCAAGGGATAC   |        |
| 3661 | ACACTTGCTGATGAAGAGGAGGATCCTTTGATTTACCAGCATCGGATGCTTAGGAGTGGC    | FAT    |
|      | G                                                               | 1240   |
| 3721 | CAAGGGGATGCATTGGCTAGTGGACCAGTGGAAACAGGACCCATGAAGAAACTGCACGTC    |        |
|      | Q G D A L A S G P V E T G P M K K L H V                         | 1260   |
| 3781 | AGCACCATCAACCTCCAAAAGGCCTGGGGCGCTGCCAGGAGGGTCTCCAAAGATGACTGG    |        |
|      | S T I N L Q K A W G A A R R V S K D D W                         | 1280   |
| 3841 | CTGGAATGGCTGAGACGGCTGAGCCTGGAGCTGCTGAAGGACTCATCATCGCCCTCCCTG    |        |
|      | L E W L R R L S L E L L K D S S S P S L                         | 1300   |
| 3901 | CGCTCCTGCTGGGCCCTGGCACAGGCCTACAACCCGATGGCCAGGGATCTCTTCAATGCT    |        |
|      | R S C W A L A Q A Y N P M A R D L F N A                         | 1320   |
| 3961 | GCATTTGTGTCTCTGCTGGTCTGAACTGAATGAAGATCAACAGGATGAGCTCATCAGAAGC   |        |
|      | A F V S C W S E L N E D Q Q D E L I R S                         | 1340   |
| 4021 | ATCGAGTTGGCCCTCACCTCACAAGACATCGCTGAAGTCACACAGACCCCTCTTAAACTTG   |        |
|      | I E L A L T S Q D I A E V T Q T L L N L                         | 1360   |
| 4081 | GCTGAATTCATGGAACACAGTGACAAGGGCCCCCTGCCACTGAGAGATGACAATGGCATT    |        |
| 4141 | GTTCTGCTGGGTGAGAGAGCTGCCAAGTGCCGAGCATATGCCAAAGCACTACACTACAAA    |        |
| 4201 | GAAGTGGAGTTCCAGAAAGGCCACCCCTGCCATTCTAGAATCTCTCATCAGCATTAAT      |        |
| 4261 | AATAAGCTACAGCAGCCGAGGACCGCCGAGGCTGAGAGTGTAGAAATATGCCATGAAACATTT |        |
| 4321 | GGAGAGCTGGAGATCCAGGCTACCTGGTATGAGAACTGACACGAGTGGGAGGATGCCCTT    |        |
| 4381 | GTGGCCTATGACAAGAAAATGGACACCAACAAGGACGACCCAGAGCTGATGCTGGGCCGC    |        |
| 4441 | ATGCGCTGCCTCGAGGCCTTGGGGGAATGGGGTCAACTCCACCAGCAGTGCTGTGAAAAG    |        |
| 4501 | TGGACCTTGGTTAATGATGAGACCCAAGCCAAGATGGCCCCGATGGCTGCTGCAGCTGCA    |        |
| 4561 | TGGGGTTTAGGTGAGTGGGACAGCATGGAAGAATACACCTGTATGATCCCTCGGGACACC    |        |
| 4621 | CATGATGGGGCATTTTATAGAGCTGTGCTGGCACTGCATCAGGACCTCTTCTCCTTGGCA    |        |
| 4681 | CAACAGTGCATTGACAAGGCCAGGGACCTGCTGGATGCTGAATTAAGTGAATGGCAGGA     |        |
| 4741 | GAGAGTTACAGTCGGGCATATGGGGCCATGGTTTCTTGCCACATGCTGTCCGAGCTGGAG    |        |
| 4801 | GAGGTTATCCAGTACAACTTGTCCCCGAGCGACGAGAGATCATCCGCCAGATCTGGTGG     |        |
| 4861 | GAGAGACTGCAGGGCTGCCAGCGTATCGTAGAGGACTGGCAGAAAATCCTTATGGTGC      |        |
| 4921 | TCCCTTGTGGTGCAGCCCTCATGAAGACATGAGAACCTGGCTCAAGTATGCAAGCCTGTGC   |        |
| 4981 | GGCAAGAGTGGCAGGCTGGCTCTTGCTCATAAACTTTAGTGTGTGCTCCTGGGAGTTGAT    |        |
| 5041 | CCGTCTCGGCAACTTGACCATCCTCTGCCAACAGTTACCCCTCAGGTGACCTATGCCTAC    |        |
| 5101 | ATGAAAAACATGTGGAAGAGTGCCCGCAAGATCGATGCCTTCCAGCACATGCAGCATTTT    |        |
| 5161 | GTCCAGACCATGCAGCAACAGGCCAGCATGCCATCGCTACTGAGGACCAGCAGCATAAG     |        |
| 5221 | CAGGAAC'TGCACAAGCTCATGGCCCGATGCTTCTTGAAACTTGGAGAGTGGCAGCTGAAT   |        |
| 5281 | CTACAGGGCATCAATGAGAGCACAATCCCCAAAGTGCTGCAGTACTACAGCGCCGCCACA    |        |
| 5341 | GAGCACGACCGCAGCTGGTACAAGGCCTGGCATGCGTGGGCAGTGATGAACTTCGAAGCT    |        |
| 5401 | GTGCTACACTACAAACATCAGAACCAAGCCCGCGATGAGAAGAAGAACTGCGTCATGCC     |        |
| 5461 | AGCGGGGGCAACATCACCAACGCCACCACTGCCGCCACCACGGCCGCCACTGCCACCACC    |        |
| 5521 | ACTGCCAGCAGCCGAGGGGCAGCAACAGTGAGAGCAGAGGCCGAGACACCGAGACCCCC     |        |
| 5581 | ACCCCATCGCCCGTGCGAAGAAGGTCATGAGGATCTGTGCAAAACCTCCTGATGTAC       |        |
| 5641 | ACGGTGCCTGCCGTCCAGGGCTTCTTCCGTTCCATCTCCTTGTACAGGACCAACACCTC     |        |
| 5701 | CAGGATACACTCAGAGTTCTCACCTTATGGTTTGGATTATGGTCACTGGCCAGATGTCAAT   |        |



**Note 2. Human RHEB gene sequence (507 bp)**

(<https://www.uniprot.org/uniprot/Q15382>)

```
1  CAGTCCAAAAGCCGCAAAATCGCCATTCTTGGCTATCGCTCTGTTGGCAAATCGAGTCTG
61  ACCATTCAGTTCGTTGAAGGCCAATTCGTTGATTCCCTATGATCCGACCATTGAAAACACC
121  TTCACGAAACTCATTACGGTTAATGGACAGGAATACCATCTGCAGTTAGTGGATACAGCT
181  GGTCAAGACGAGTACAGCATCTTTCCACAGACCTATTGATTGACATCAATGGCTACATT
241  CTGGTGTATAGTGTCACTTCGATCAAAAAGCTTTGAAGTGATCAAGGTGATTCATGGGAAA
301  CTGCTGGATATGGTGGGTAAAAGTGCAGATTCCGATCATGCTGGTAGGTAACAAGAAAGAC
361  TTGCACATGGAACGTGTCATCTCATATGAAGAGGGGAAAGCTTTAGCCGAATCTTGGAAT
421  GCGGCATTTCTGGAGAGCTCAGCGAAAAGAGAACCAAACCTGCAGTAGATGTCTTTCGTCGC
481  ATTATTCTGGAAGCGGAAAAGTTGGAA
```

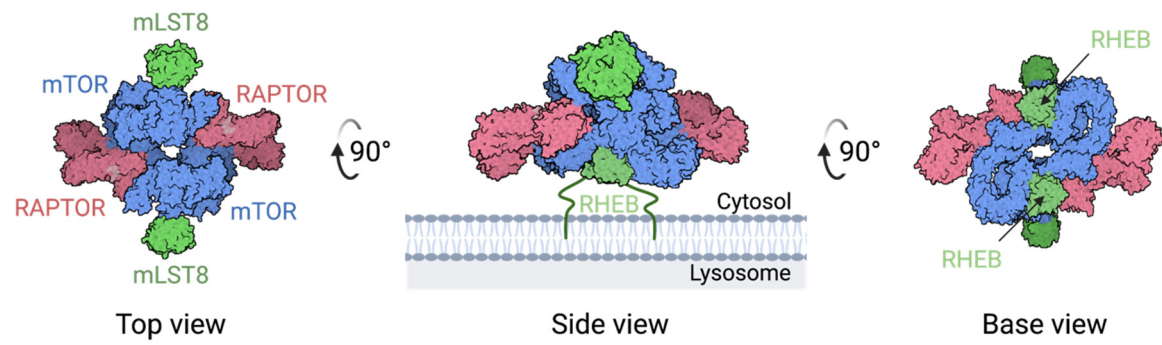

**Figure S1:** On-lysosome activation of mTORC1 by RHEB. Illustration created by BioRender (<https://app.biorender.com/>).

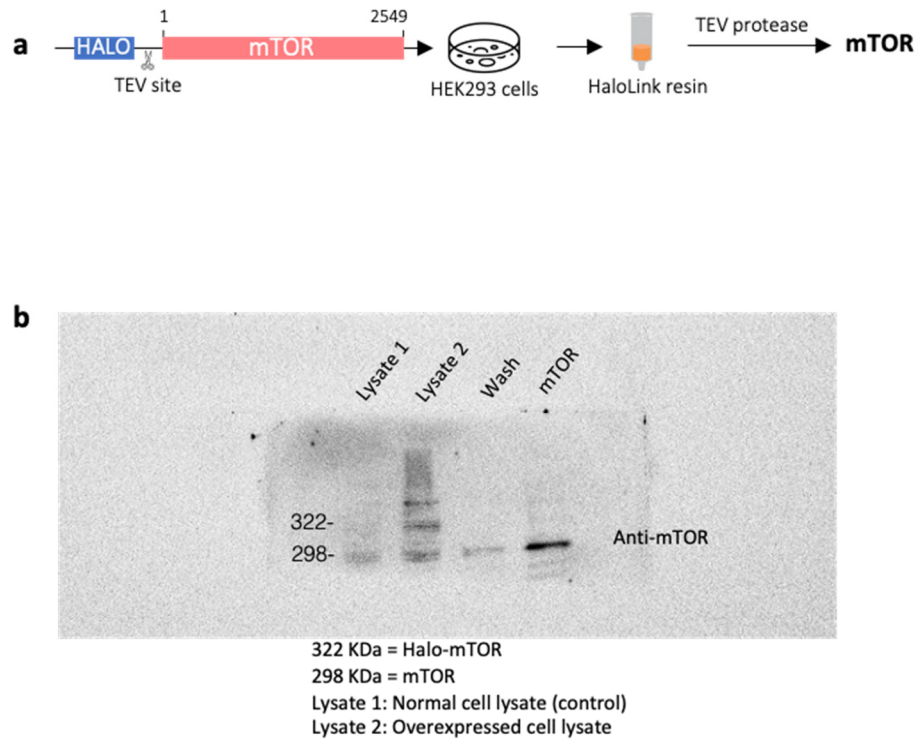

**Figure S2.** Construction and purification of overexpressed mTOR. **(a)** Schematic illustration showing the Halo-tagged mTOR construct in pFN21A vector which was transfected into HEK293 cells and purified by HaloLink resin. TEV site (EDLYFQ ↓ S) is a cleavage site for TEV protease. **(b)** Whole view of Western blot analysis of the different stages of mTOR purification showing the expression of the Halo-tagged mTOR.

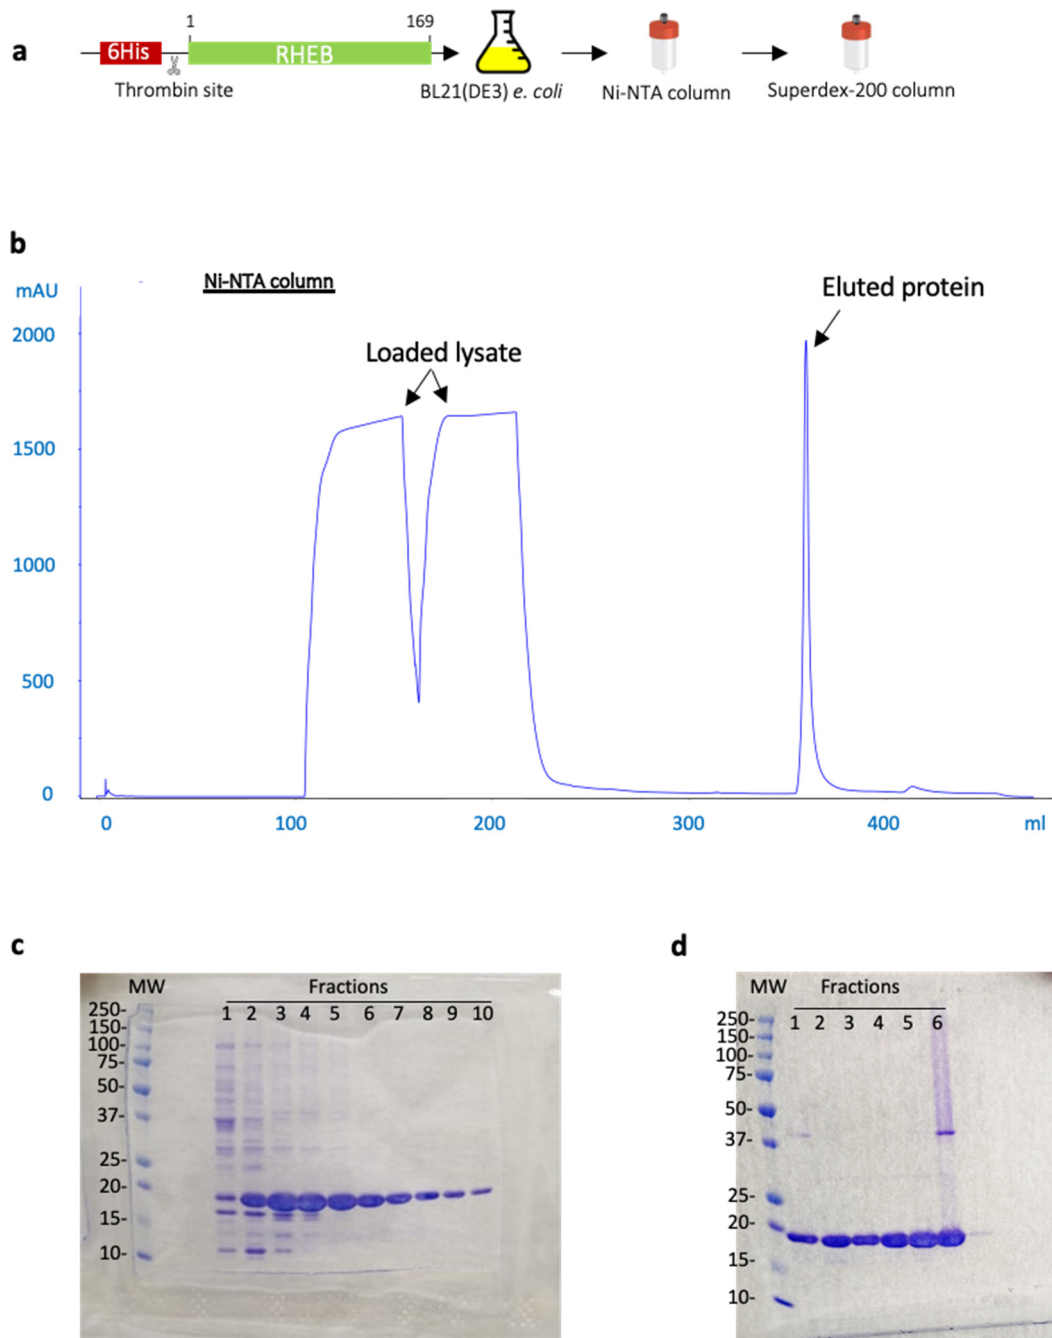

**Figure S3.** Construction and purification of overexpressed RHEB (aa 1-169). **(a)** Schematic illustration showing the 6His-tagged RHEB construct in pET15b vector which was transformed into BL21(DE3) *E. coli* and purified by Ni-NTA and Superdex-200 columns. **(b)** FPLC chromatogram of RHEB purification by Ni-NTA column. **(c)** Coomassie brilliant blue R-250 stained SDS-PAGE of the eluted fractions of RHEB (~20 kDa) from Ni-NTA column. The contaminating bands of fractions 1-4 were due to the molecules nonspecifically bound on the Ni-NTA column. Fractions 5-10 were used for Superdex-200 purification. **(d)** Full image SDS-PAGE (stained with Coomassie brilliant blue R-250) of the eluted fractions of RHEB protein from Superdex-200 column. Fractions 1 and 6 contain mixture of RHEB monomer and dimer. Fractions 2-5 were used as a final RHEB product.



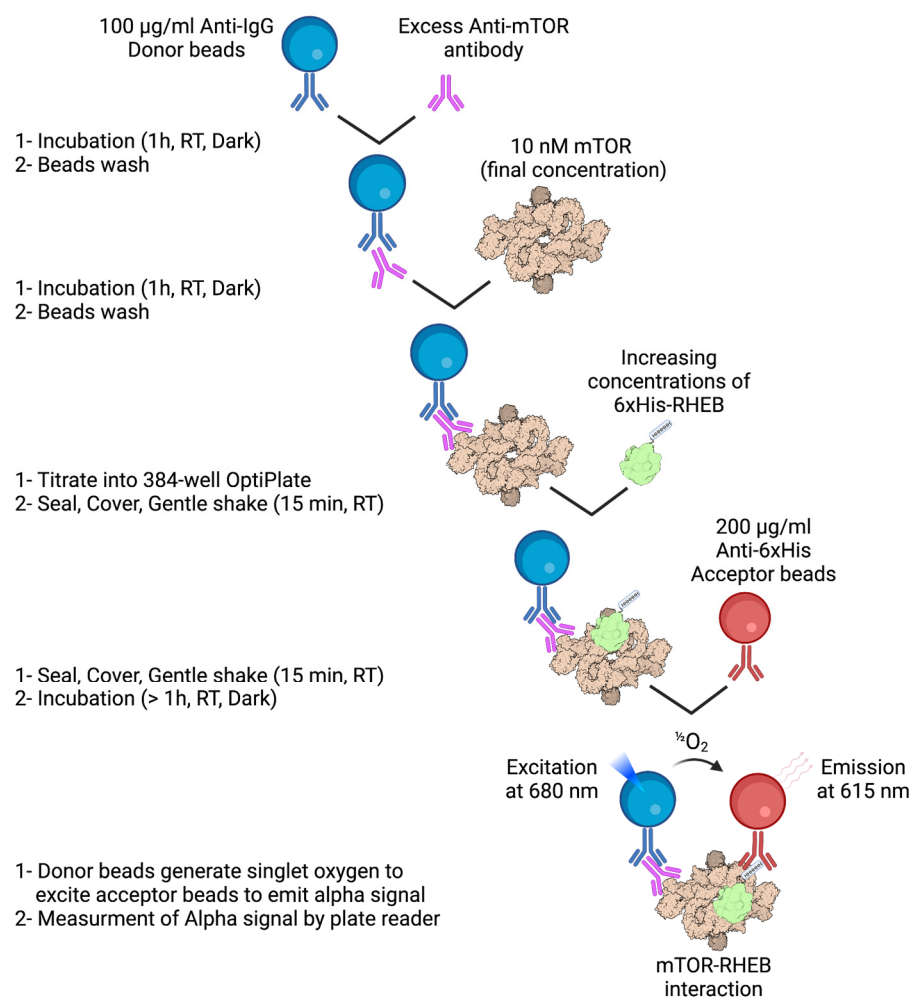

**Figure S4.** The established AlphaLISA method used to determine the binding kinetics of RHEB-mTOR interaction. RT, room temperature. Illustration created by BioRender (<https://app.biorender.com/>).

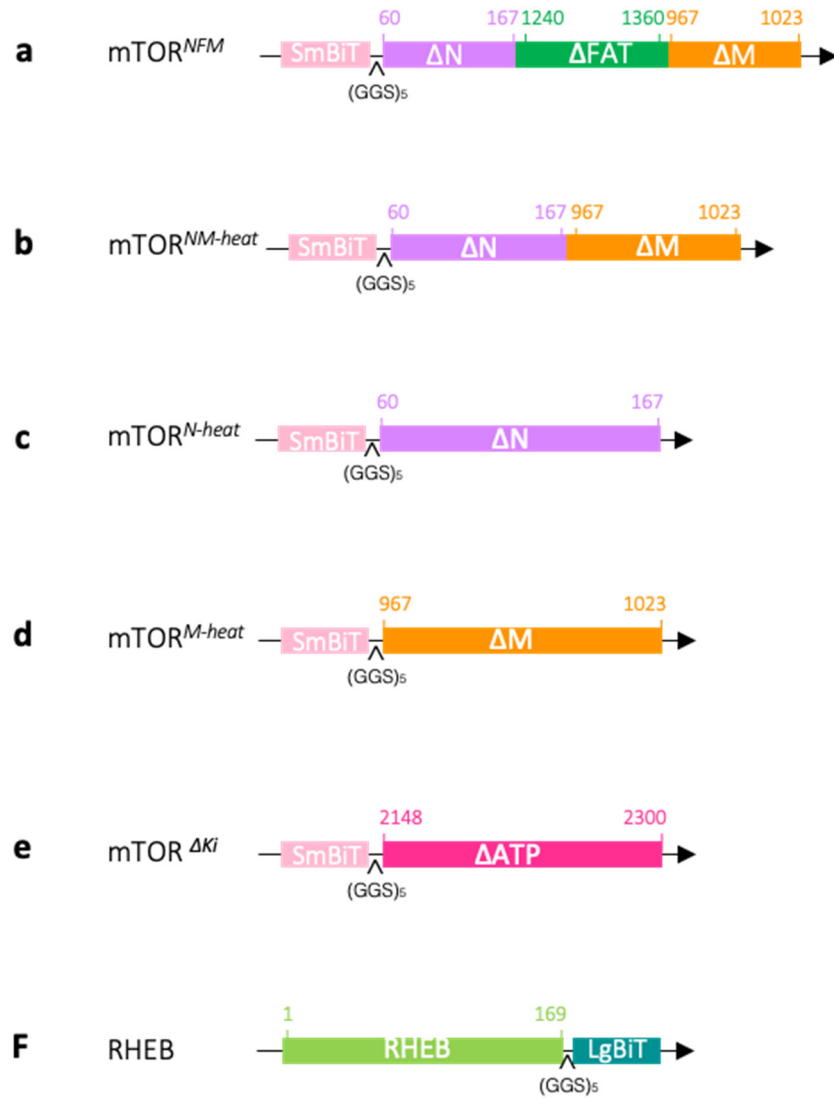

**Figure S5.** Plasmids of the indicated constructs for NanoBiT assay showing the SmBiT subunit at the N-terminus and the LgBiT subunit of RHEB at the C-terminus. (GGG)<sub>5</sub> is five repeats of GGS amino acid sequence as a linker between the protein of interest and the SmBiT or LgBiT.

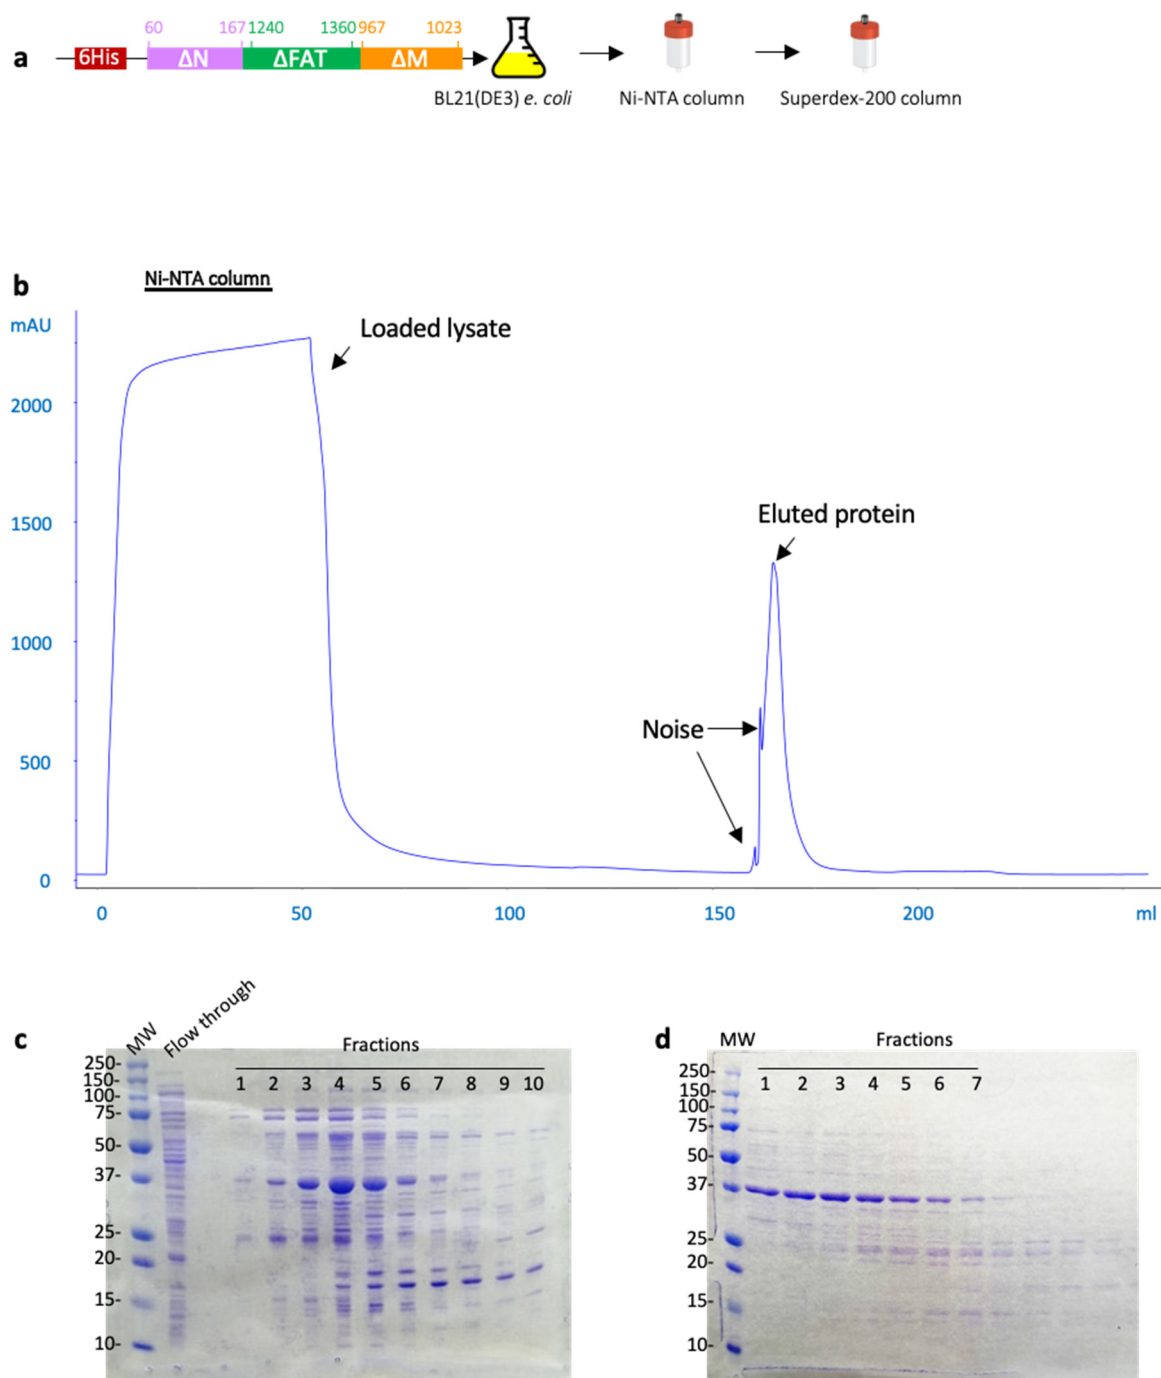

**Figure S6.** Construction and purification of overexpressed  $\Delta$ N-FAT-M (aa 60-167, aa 1240-1360, aa 967-1023). (a) Schematic illustration showing the 6His-tagged  $\Delta$ N-FAT-M construct in pET15b vector which was transformed into BL21(DE3) *E. coli* and purified by Ni-NTA and Superdex-200 columns. (b) FPLC chromatogram of  $\Delta$ N-FAT-M purification by Ni-NTA column. Loaded lysate is a flow through without binding. (c) Coomassie brilliant blue R-250 stained SDS-PAGE of the eluted fractions of  $\Delta$ N-FAT-M (~37.5 kDa) from Ni-NTA column. Fractions 1-6 were used for Superdex-200 purification. (d) Full image SDS-PAGE (stained with Coomassie brilliant blue R-250) of the eluted fractions of  $\Delta$ N-FAT-M protein from Superdex-200 column. Fractions 1-4 were used as a final  $\Delta$ N-FAT-M product. The contaminating bands were probably derived from protein oligomerization.

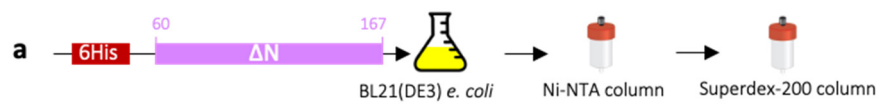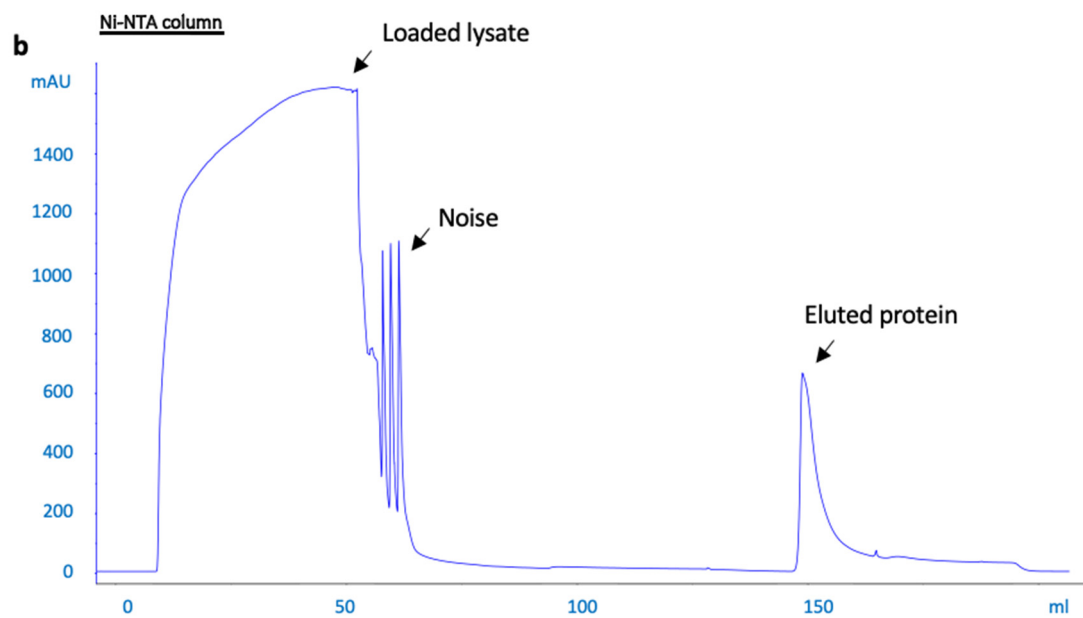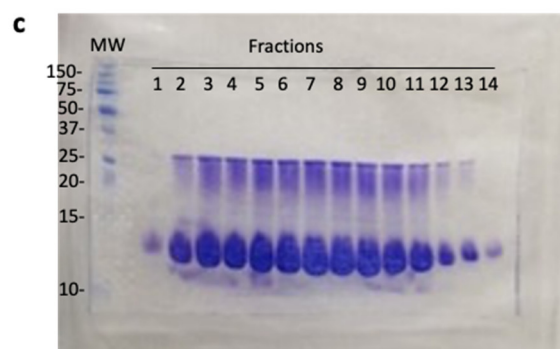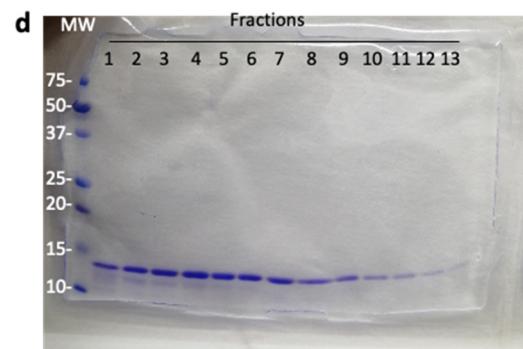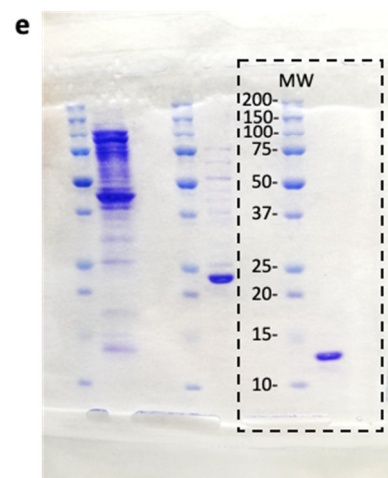

**Figure S7.** Construction and purification of overexpressed  $\Delta N$  (60-167). **(a)** Schematic illustration showing the 6His-tagged  $\Delta N$  construct in pET15b vector which was transformed into BL21(DE3) E. coli and purified by Ni-NTA and Superdex-200 columns. **(b)** FPLC chromatogram of  $\Delta N$  purification by Ni-NTA column. Loaded lysate is a flow through without binding. **(c)** Coomassie brilliant blue R-250 stained SDS-PAGE of the eluted fractions of  $\Delta N$  (~13.3 kDa) from Ni-NTA column. Fractions 1-14 containing mixture of monomer and dimer were used for Superdex-200 purification. Loaded lysate is a flow through without binding. **(d)** Full image of SDS-PAGE (stained with Coomassie brilliant blue R-250) of the eluted fractions of  $\Delta N$  protein eluted from Superdex-200 column. **(e)** Full image of SDS-PAGE showing the final product of  $\Delta N$  highlighted by the dotted square. The other bands are for another studies.

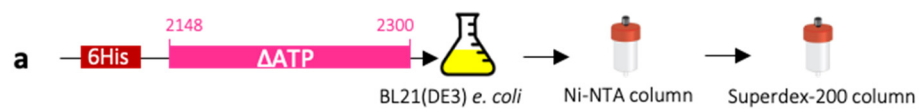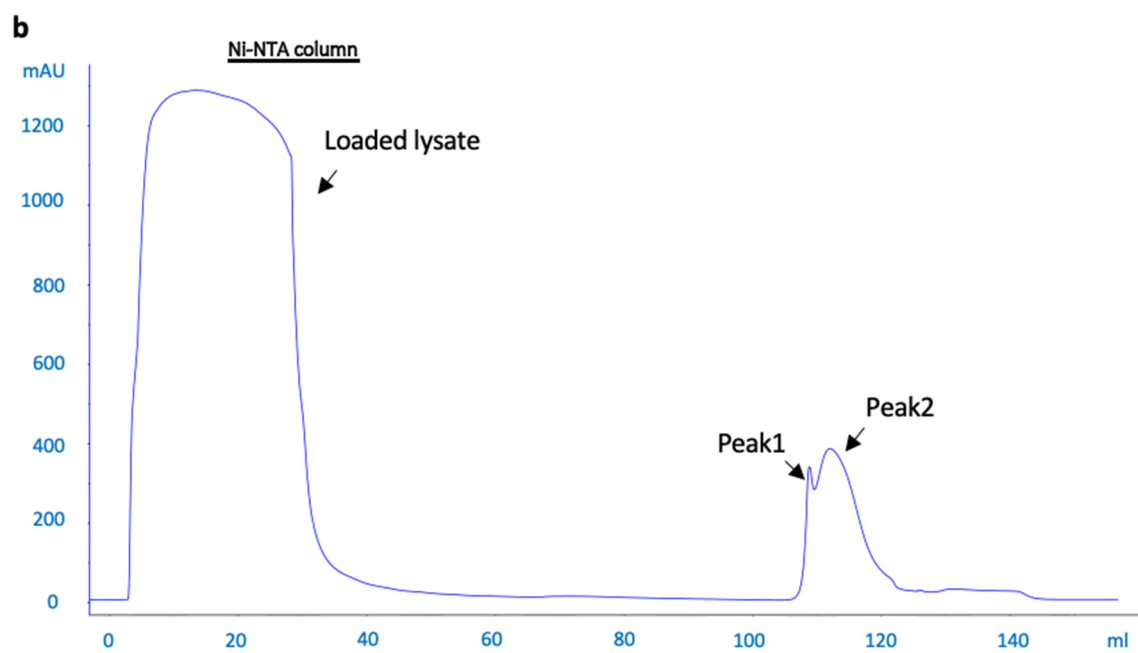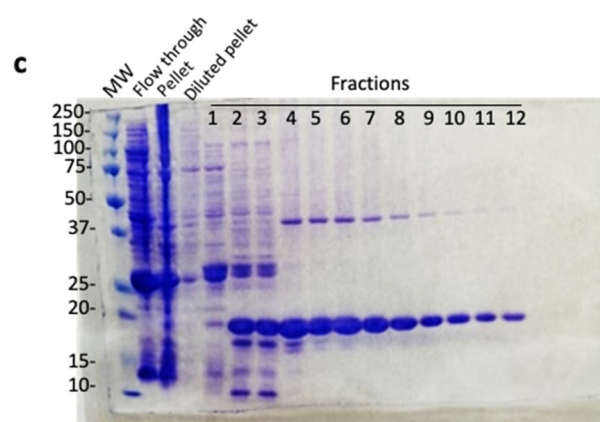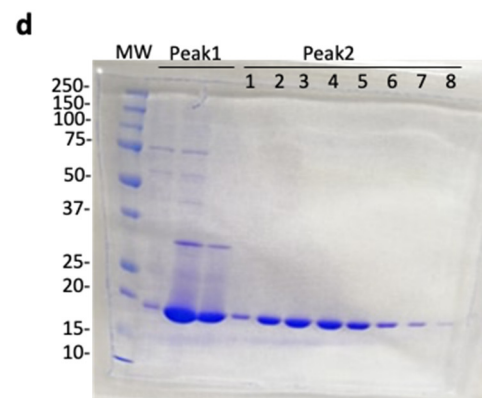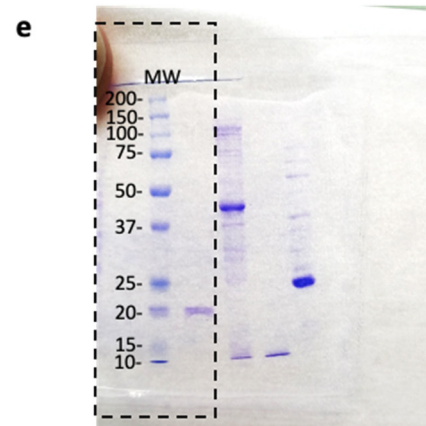

**Figure S8.** Construction and purification of overexpressed  $\Delta$ ATP (2148-2300). **(a)** Schematic illustration showing the 6His-tagged  $\Delta$ ATP construct in pET15b vector which was transformed into BL21(DE3) *E. coli* and purified by Ni-NTA and Superdex-200 columns. **(b)** FPLC chromatogram of  $\Delta$ ATP purification by Ni-NTA column. Loaded lysate is a flow through without binding. **(c)** Full image of SDS-PAGE (stained with Coomassie brilliant blue R-250) of the fractions of  $\Delta$ ATP (~20 kDa) eluted from Ni-NTA column. The contaminating bands of fractions 1-3 were due to the nonspecific binding on Ni-NTA column. Fractions 4-12 contain mixture of monomer and dimer were used for Superdex-200 purification. **(d)** Full image of SDS-PAGE (stained with Coomassie brilliant blue R-250) of the eluted fractions of  $\Delta$ ATP protein from Superdex-200 column. Peak1 fractions were for protein oligomers while peak2 fraction were for  $\Delta$ ATP monomer. **(e)** Full image of SDS-PAGE showing the final product of  $\Delta$ ATP highlighted by the dotted square. The other bands are for another studies.

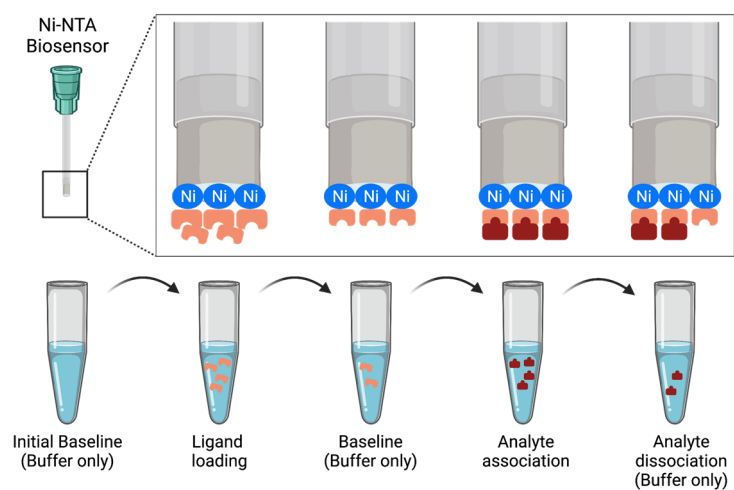

**Figure S9.** Schematic illustration showing the BLItz measurement steps of protein-protein interactions. The experiments were performed with shaking at 2000 rpm at 25 °C. The illustration was created by BioRender (<https://app.biorender.com/>).
